# Supplementary material for: Composition and Bioactivity from the Essential Oil of <em>Tetradenia riparia </em>in Pathogenic Bacteria, <em>Aedes aegypti</em> L. (Diptera: Culicidae), and Toxicological Evaluation of <em>Mus musculus </em>(Rodentia: Muridae)
Source: Preprints.org preprint supplement (doi:10.20944/preprints202403.0105.v1), 2024-03-04

**SUPPLEMENTARY MATERIAL**

**Composition and bioactivity from the essential oil of *Tetradenia riparia* in pathogenic bacteria, *Aedes aegypti* L. (Diptera: Culicidae), and toxicological evaluation of *Mus musculus* (Rodentia: Muridae)**

Érica de M. Rabelo 1, Rosany L. Martins 1, Alex Bruno L. Rodrigues 2, Ridelley de S. de Sousa 1, Ana Luzia F. Farias 1, Allan Kardec R. Galardo 3, Patrick de C. Cantuária 4, Rosana Tomazi 5 and Sheylla Susan M. da S. de Almeida 1*

1 Department of Biological and Health Sciences, Federal University of Amapa, Macapa´, Amapa´, Brazil; ericamrabelo@gmail.com (E.R.); rosyufpa@gmail.com (R.M.); analuziafarias.quimica@outlook.com (A.F)

2 Department of Exact and Technological Sciences, Federal University of Amapa´, Macapa´, Amapa´, Brazil; alexrodrigues.quim@gmail.com (A.R.)

3 Laboratory of Medical Entomology, Institute of Scientific and Technological Research of the State of Amapa´, Macapa´, Amapa´, Brazil; allangalardo@gmail.com (A. G.)

4 Institute of Scientific and Technological Research of the State of Amapá, Macapa´, Amapa´, Brazil; patrickcantuaria@gmail.com (P. C.)

5 Federal Institute of Amapá, Macapa´, Amapa´, Brazil; rosana.tomazi@ifap.edu.br (R.T)

* Correspondence: sheyllasusan@yahoo.com.br

**ABSTRACT**

Objective: In this work, we evaluated the chemical composition by chromatography coupled to mass spectrometry, antimicrobial and insecticidal activity of essential oils (TrEO) and nanoeffusion (NTrEO) of oil from *Tetradenia riparia* leaves. We also evaluated the acute toxicity in *Mus musculus*. The results showed that *S. aureus* showed greater susceptibility to TrEO, with a minimum inhibitory concentration (MIC) of 125 µg.mL-1, when compared to *P. aeruginosa*, *E. coli*, which presented a MIC of 250 µg.mL-1. There was a greater toxic effect on TrEO (LC50 = 630.29 µg.mL-1) and NTrEO (LC50 = 713.68 µg.mL-1) larvae, effect on pupae (LC50 = 630.29 µg.mL-1) and NTrEO (LC50 = 713.68 µg.mL-1) and ovicide (LC50 = 631.184 µg.mL-1) and NTrEO (LC50 = 146.701 µg.mL-1) of *Ae. aegypti* after 24 h of exposure, when compared to other exposure periods. Chemical analysis revealed 20 components, aromadendrene oxide (23.47%) being the main component. Female and male mice were used to assess toxicity and oral administration of NTrEO to mice did not result in acute toxicity. Thus, the essential oil of *T. riparia* and its nanoemulsion have insecticidal and antimicrobial potential for *Ae. aegypti*, *S. aureus*, *E. coli,* *P. aeruginosa,* and has a high toxicological safety threshold at the concentrations evaluated in this study.

**List of supplementary materials**

|  | **Page** |
| --- | --- |
| **Fig. S1** Chromatogram of the essential oil of *T. riparia* | **2** |
| **Table S2.** Physical parameters of *T. riparia* nano-emulsions in different hydrophilic-lipophilic balance values at 0, 7, 14 and 21 days. | **11** |
| **Doc.S3** Approved by the Ethics Committee of Federal University of Amapa, Macapa- UNIFAP | **12** |

**Fig. S1** Chromatogram of the essential oil of *T. riparia*

**Cromatogram of essential oil from *Tetradenia riparia***

***
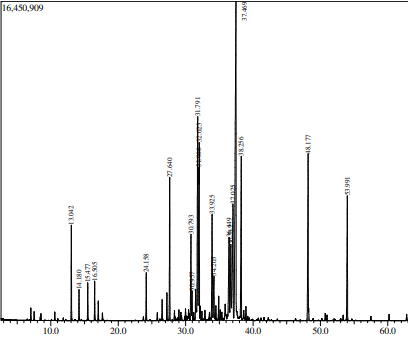
***

**RT = 13.040** L-Fenchone

Compound mass spectrum


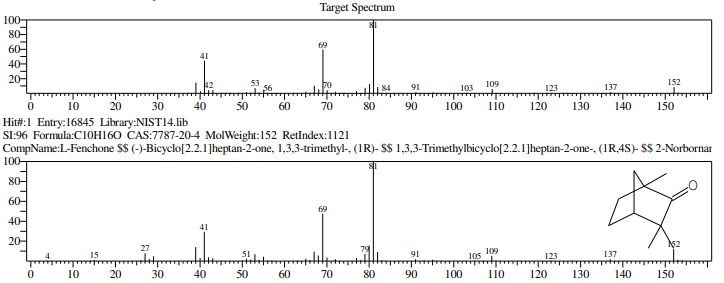


Mass spectral library


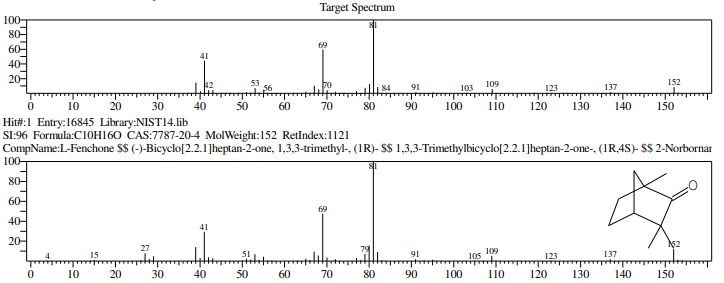


**RT = 14.180 Fenchol**

Compound mass spectrum


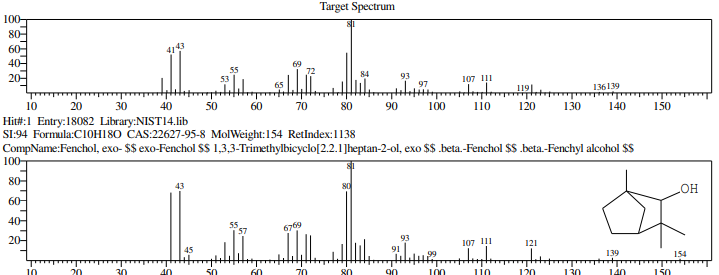


Mass spectral library


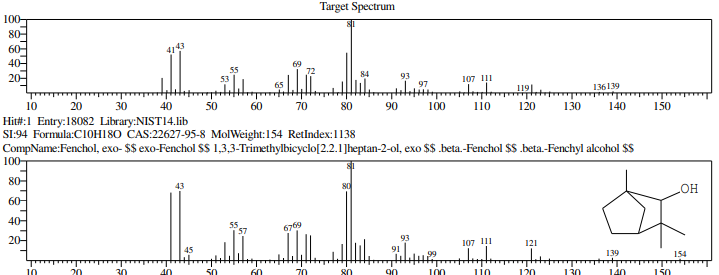


**RT = 15.477 Camphor**

Compound mass spectrum


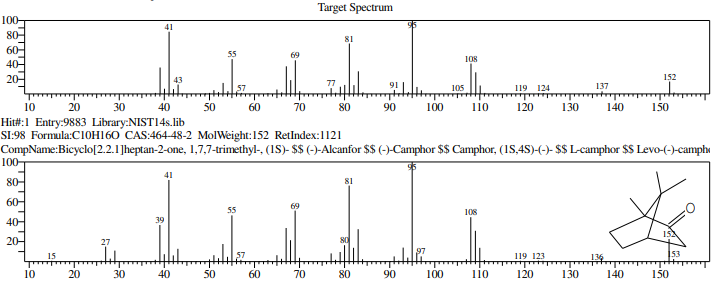


Mass spectral library


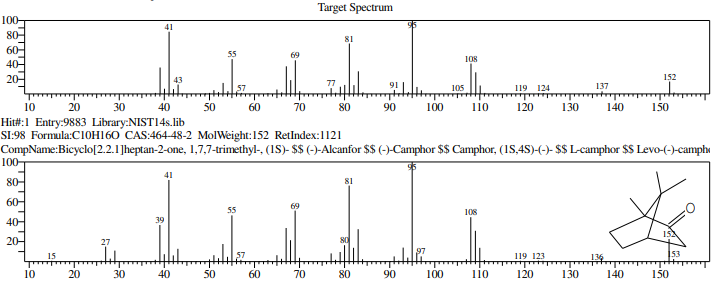


**RT = 16.505 (+) -Borneol**

Compound mass spectrum


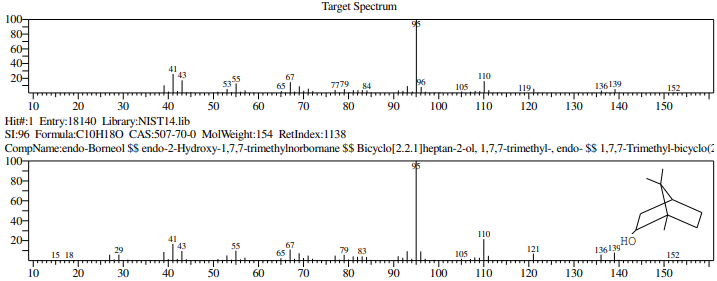


Mass spectral library


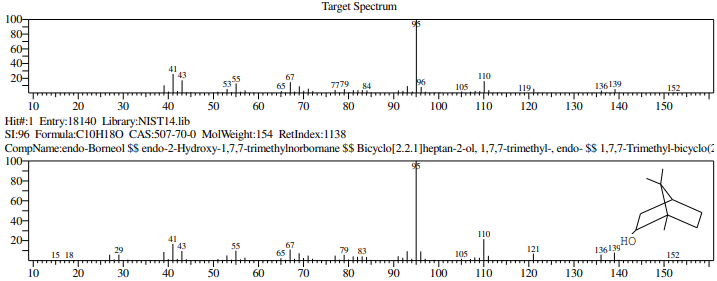


**RT = 24.158 γ-Elemene**

Compound mass spectrum


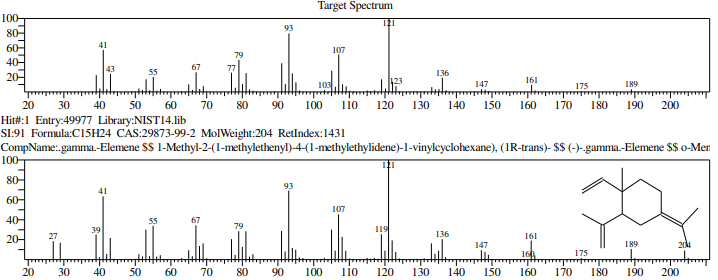


Mass spectral library


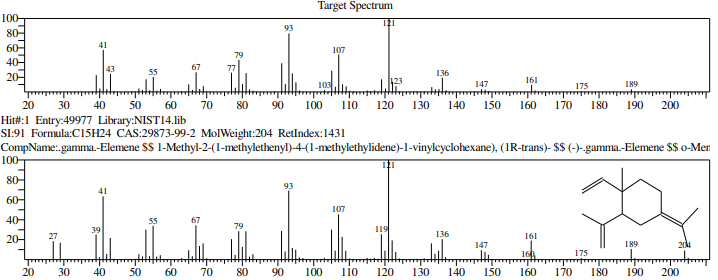


**RT = 27.640 Isocaryophyllene**

Compound mass spectrum


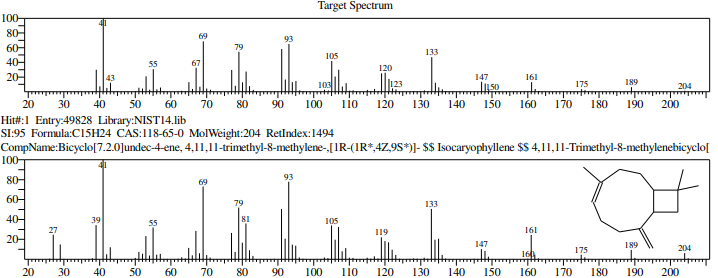


Mass spectral library


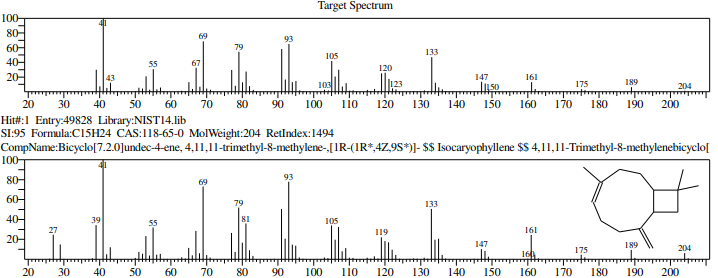


**RT = 30.793 Germacrene B**

Compound mass spectrum


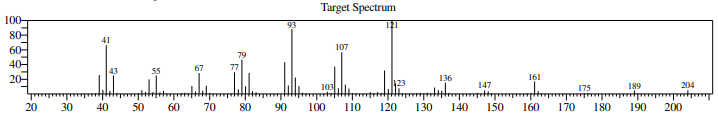


Mass spectral library


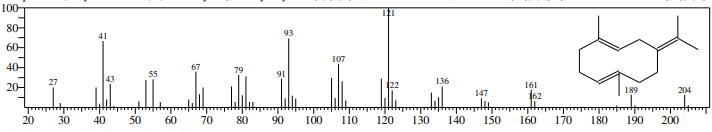


**RT = 30.957 α-Muurolene**

Compound mass spectrum


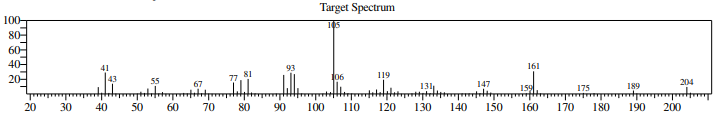


Mass spectral library


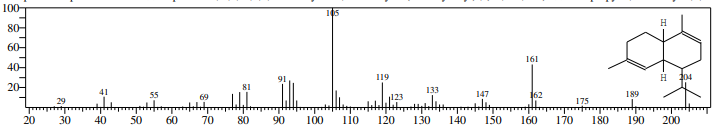


**RT = 31.791 Isogeraniol**

Compound mass spectrum


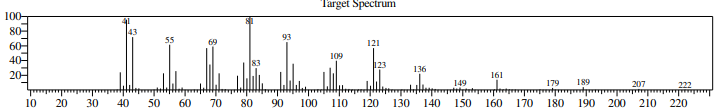


Mass spectral library


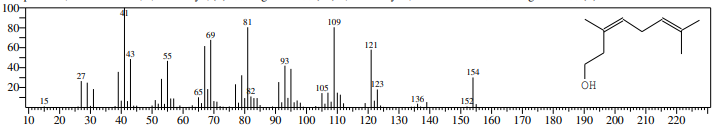


**RT = 31.996 Δ-Cadinene**

Compound mass spectrum


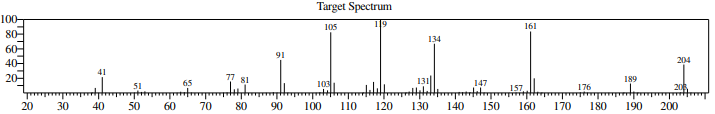


Mass spectral library


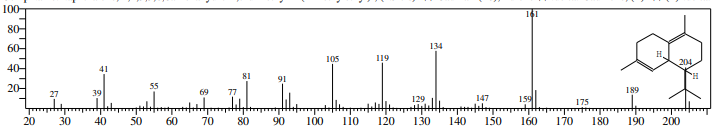


**RT = 32.023 6-epi-shyobunol**

Compound mass spectrum


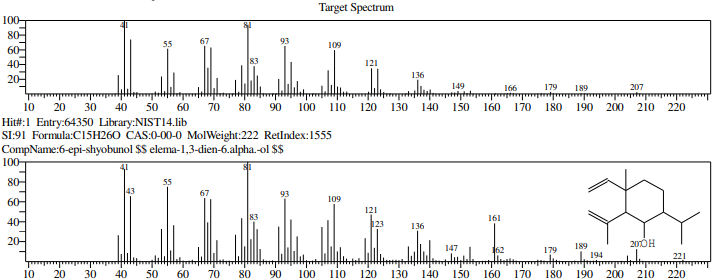


Mass spectral library


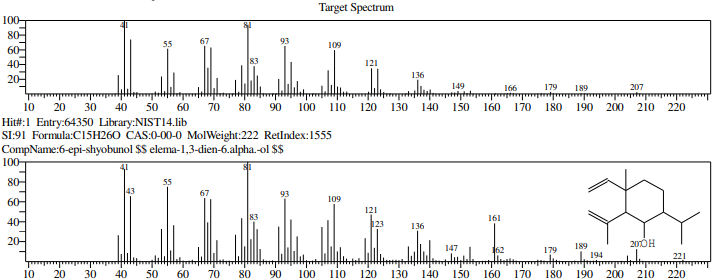


**RT = 33.925 Germacrene D-4-ol**

Compound mass spectrum


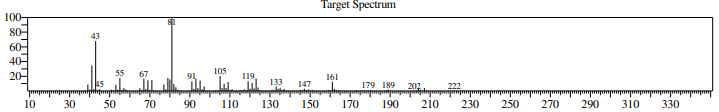


Mass spectral library


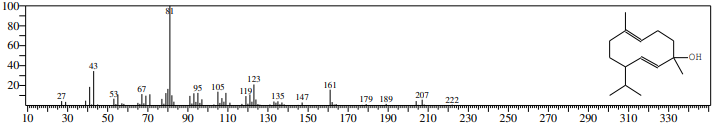


**RT = 34.203 Viridiflorol**

Compound mass spectrum


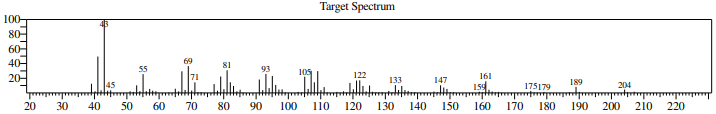


Mass spectral library


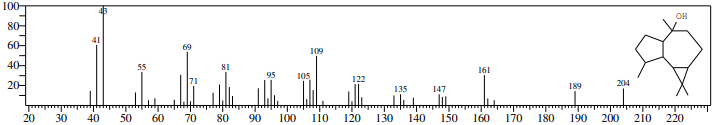


**RT = 36.449 τ-Muurolol**

Compound mass spectrum


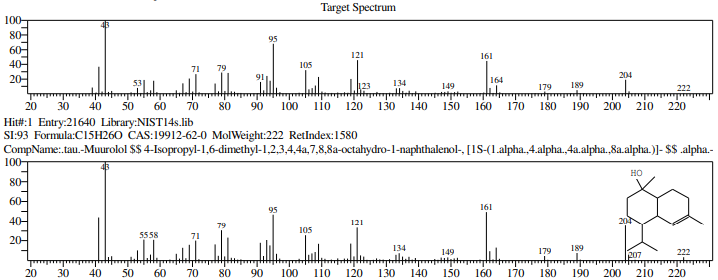


Mass spectral library


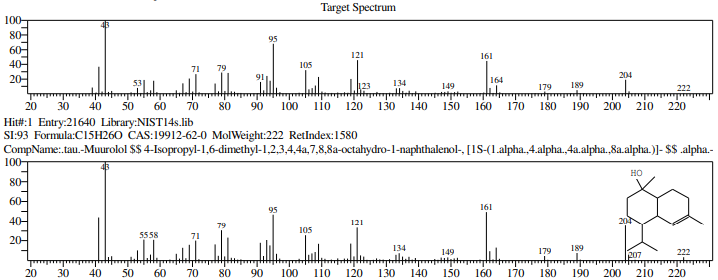


**RT = 36.712 β-Bisabolene**

Compound mass spectrum


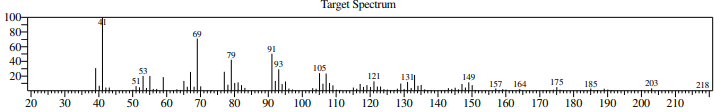


Mass spectral library


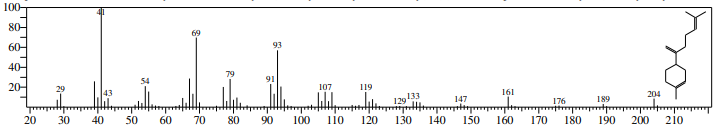


**RT = 37.025 α-Cadinol**

Compound mass spectrum


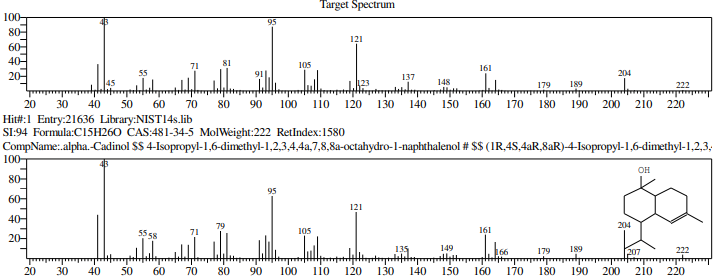


Mass spectral library


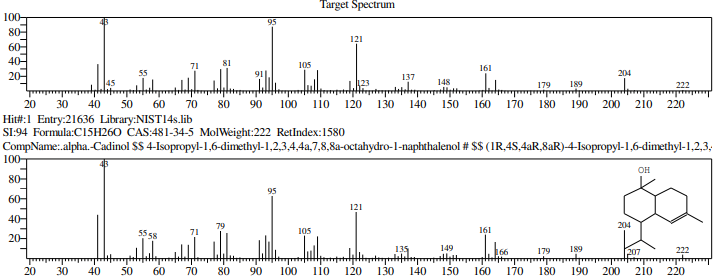


**RT = 37.469 Aromadendrene oxide**

Compound mass spectrum


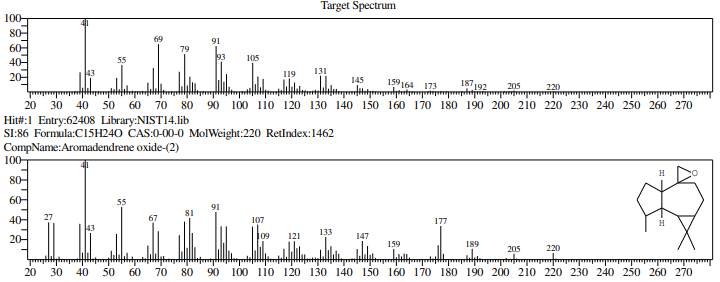


Mass spectral library


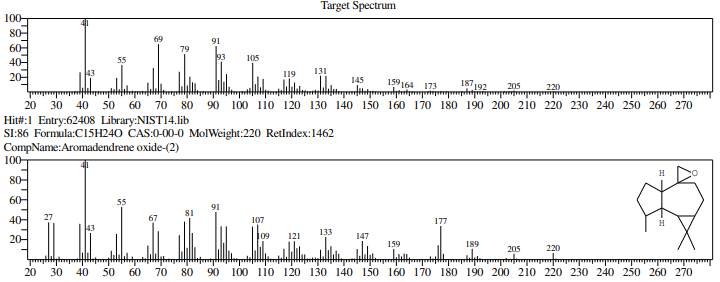


**RT = 38.256 Shyobunol**

Compound mass spectrum


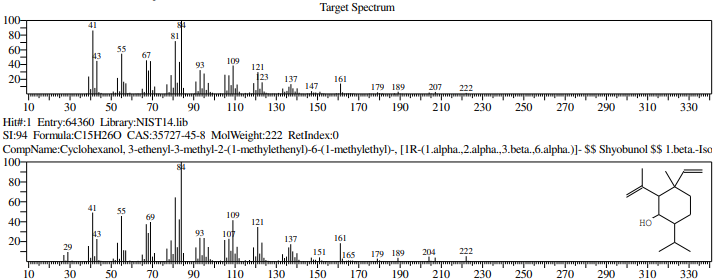
 Mass spectral library


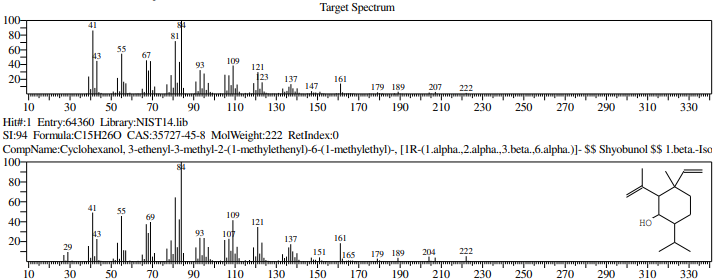


**RT = 48.177 Ledol**

Compound mass spectrum


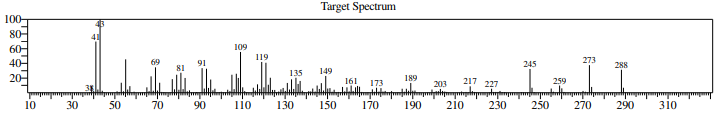


Mass spectral library


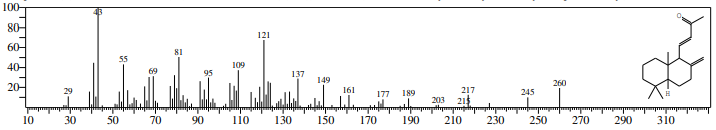


**RT = 48.177 Ledol**

Compound mass spectrum


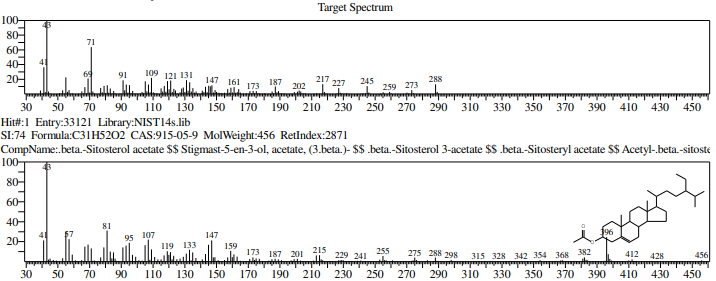


Mass spectral library


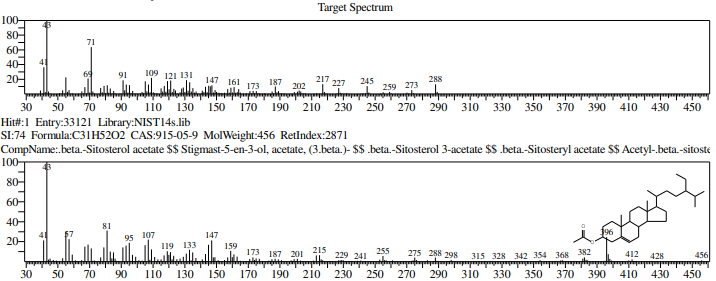


**Table S2.** Physical parameters of *T. riparia* nano-emulsions in different hydrophilic-lipophilic balance values at 0, 7, 14, and 21 days.

|  | Dia 0 | | | | | |
| --- | --- | --- | --- | --- | --- | --- |
| HLB | PS | ±PS | PdI | ±PdI | ZP | ±ZP |
| 10 | 188.70 | 0.31 | 0.33 | 0.01 | -37.63 | 0.86 |
| 11 | 185.17 | 0.32 | 0.30 | 0.00 | -34.57 | 0.75 |
| 12 | 181.03 | 0.21 | 0.26 | 0.01 | -31.43 | 0.25 |
| 13 | 176.33 | 0.35 | 0.23 | 0.01 | -28.57 | 0.65 |
| 14 | 167.93 | 0.36 | 0.23 | 0.02 | -27.00 | 0.26 |
| 14.5 | 159.57 | 0.59 | 0.23 | 0.01 | -25.50 | 0.47 |
| 15 | 155.67 | 0.26 | 0.13 | 0.02 | -16.50 | 0.24 |
| 15.5 | 100.93 | 0.76 | 0.26 | 0.00 | -20.13 | 1.60 |
| 16 | 158.57 | 0.26 | 0.19 | 0.00 | -29.30 | 0.17 |
|  | Dia 07 | | | | | |
| HLB | PS | ±PS | PdI | ±PdI | ZP | ±ZP |
| 10 | 164.93 | 0.64 | 0.42 | 0.00 | -49.00 | 0.42 |
| 11 | 163.10 | 0.35 | 0.24 | 0.01 | -38.37 | 0.47 |
| 12 | 148.00 | 0.24 | 0.24 | 0.00 | -38.37 | 0.37 |
| 13 | 134.47 | 0.47 | 0.23 | 0.00 | -37.57 | 0.13 |
| 14 | 144.60 | 0.35 | 0.17 | 0.00 | -16.97 | 0.46 |
| 14.5 | 153.83 | 0.30 | 0.28 | 0.01 | -30.00 | 0.13 |
| 15 | 153.83 | 0.23 | 0.18 | 0.01 | -37.37 | 0.43 |
| 15.5 | 85.22 | 0.45 | 0.26 | 0.00 | -34.87 | 0.58 |
| 16 | 180.20 | 0.43 | 0.10 | 0.10 | -28.13 | 0.51 |
|  | Dia 14 | | | | | |
| HLB | PS | ±PS | PdI | ±PdI | ZP | ±ZP |
| 10 | 156.60 | 0.13 | 0.40 | 0.00 | -12.20 | 0.44 |
| 11 | 159.43 | 0.22 | 0.26 | 0.01 | -43.13 | 0.46 |
| 12 | 140.83 | 0.16 | 0.24 | 0.00 | -40.97 | 0.25 |
| 13 | 134.57 | 0.12 | 0.24 | 0.00 | -35.97 | 0.43 |
| 14 | 146.83 | 0.12 | 0.18 | 0.01 | -28.77 | 0.46 |
| 14.5 | 147.60 | 0.12 | 0.28 | 0.00 | -39.90 | 0.30 |
| 15 | 153.63 | 0.35 | 0.18 | 0.00 | -33.93 | 0.52 |
| 15.5 | 86.17 | 0.31 | 0.26 | 0.01 | -32.73 | 0.69 |
| 16 | 178.67 | 0.54 | 0.12 | 0.01 | -37.23 | 0.23 |
|  | Dia 21 | | | | | |
| HLB | PS | ±PS | PdI | ±PdI | ZP | ±ZP |
| 10 | 155.43 | 0.32 | 0.39 | 0.00 | -9.71 | 0.43 |
| 11 | 170.67 | 0.12 | 0.26 | 0.01 | -39.27 | 0.25 |
| 12 | 139.43 | 0.65 | 0.24 | 0.00 | -36.27 | 0.61 |
| 13 | 135.43 | 0.21 | 0.24 | 0.01 | -38.40 | 0.34 |
| 14 | 138.97 | 0.34 | 0.20 | 0.00 | -35.53 | 0.29 |
| 14.5 | 159.07 | 0.25 | 0.36 | 0.00 | -45.17 | 0.37 |
| 15 | 149.27 | 0.36 | 0.21 | 0.00 | -34.27 | 0.39 |
| 15.5 | 81.12 | 0.17 | 0.25 | 0.00 | -44.17 | 0.70 |
| 16 | 188.07 | 0.11 | 0.09 | 0.01 | -40.07 | 0.40 |

**Doc.S3** Approved by the Ethics Committee of Federal University of Amapa, Macapa- UNIFAP


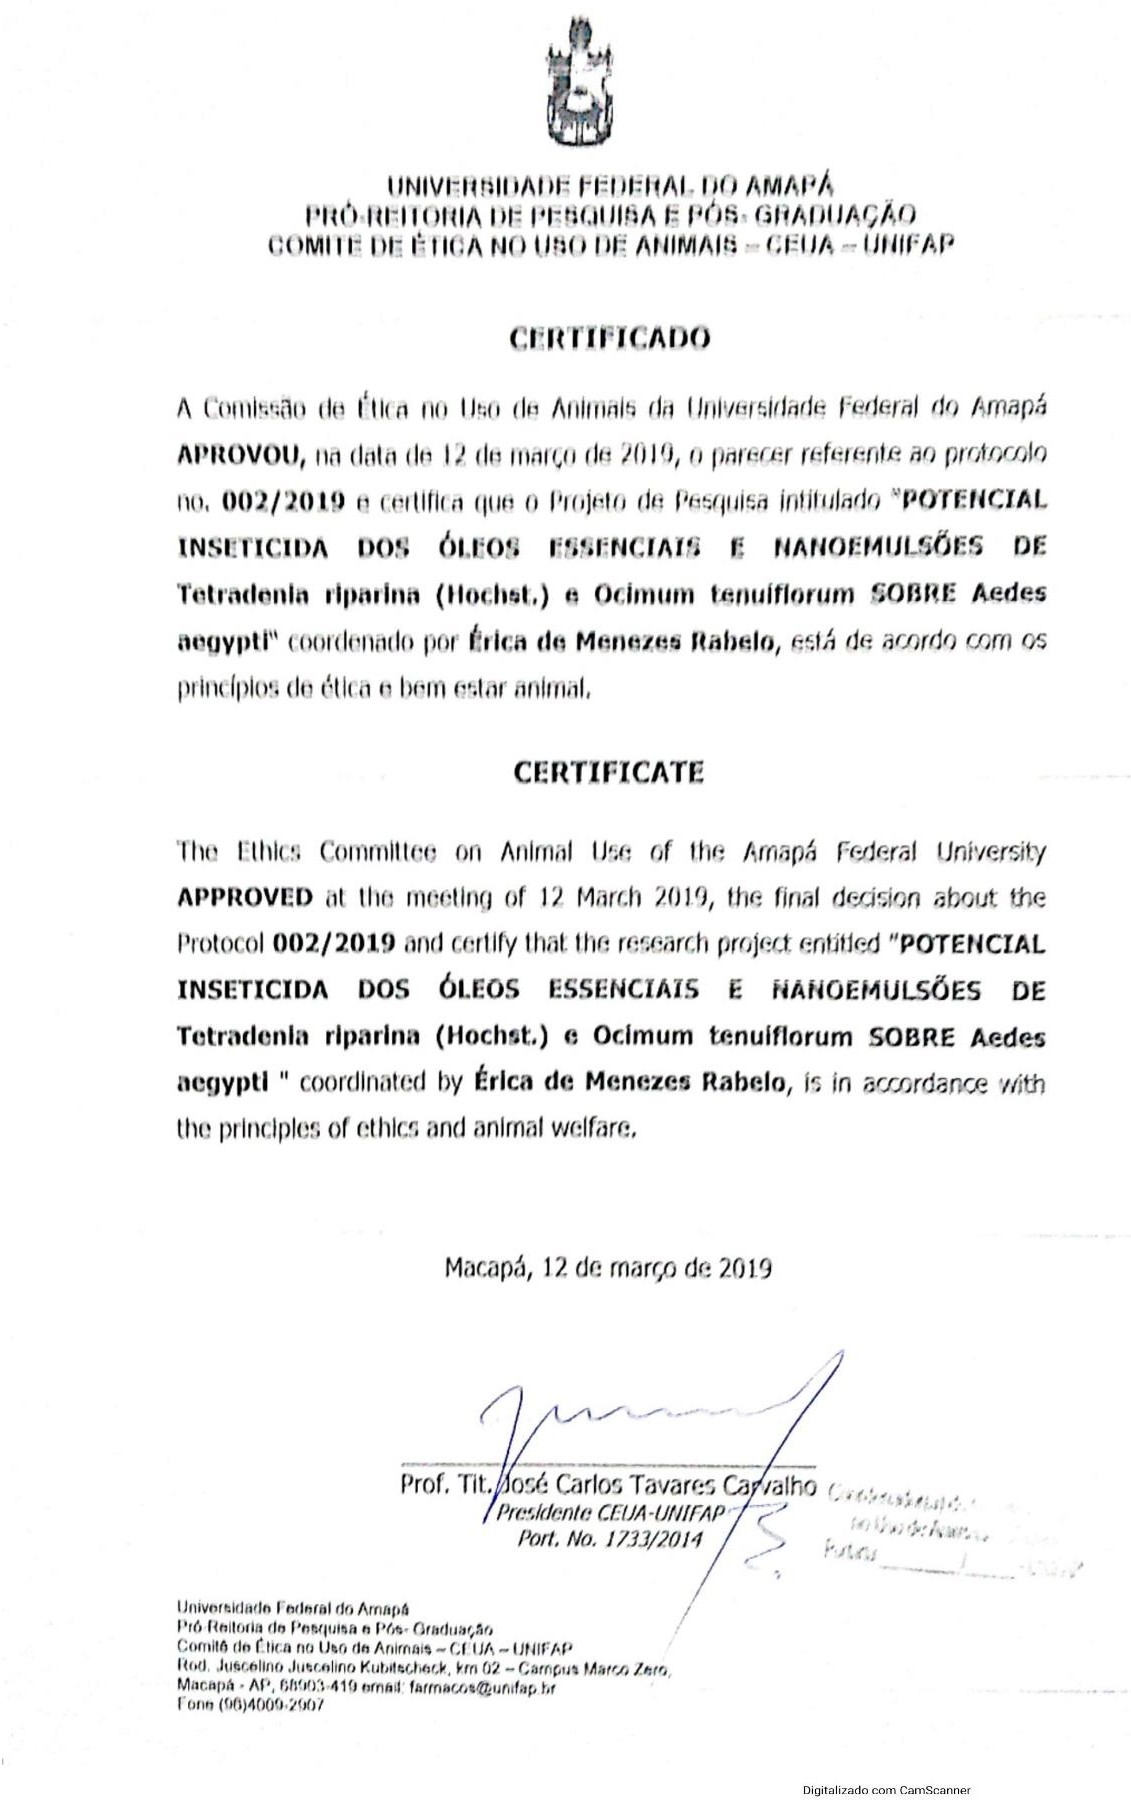

Supplement: Supplementary file 1 [file supplementary]
